# Supplementary material
Source: publisher figshare collection journal article supplement (https://acs.figshare.com/ndownloader/files/10391979)
Supplement: Supplementary file 1 [file 10391979]

## Supporting information

### UV- and NIR-Protective Semi-Transparent Smart Windows Based on Metal Halide Solar Cells

Karunakara Moorthy Boopathi,<sup>†</sup> Chintam Hanmandlu,<sup>†, ‡</sup> Anupriya Singh,<sup>†, §</sup> Yang-Fang Chen,<sup>§</sup> Chao Sung Lai,<sup>‡</sup> and Chih Wei Chu<sup>\*, †, ||, §</sup>

<sup>†</sup>*Research Center for Applied Science, Academia Sinica, 128 Academia Road, Sec. 2, Nangang, Taipei 115, Taiwan (R.O.C).*

<sup>‡</sup>*Department of Electronic Engineering, Chang Gung University, No. 259, Wenhua 1st Road, Guishan District, Taoyuan City 33302, Taiwan (R.O.C.).*

<sup>§</sup>*Department of Physics, National Taiwan University, No. 1, Sec. 4, Roosevelt Road, Taipei 106, Taiwan (R.O.C.).*

<sup>||</sup>*College of Engineering, Chang Gung University, No. 259, Wenhua 1st Road, Guishan District, Taoyuan City 33302, Taiwan (R.O.C.).*

<sup>§</sup>*Department of Materials Science and Engineering, National Tsing Hua University, Hsinchu 30013, Taiwan (R.O.C.)*

<sup>\*</sup>*E-mail: gchu@gate.sinica.edu.tw*

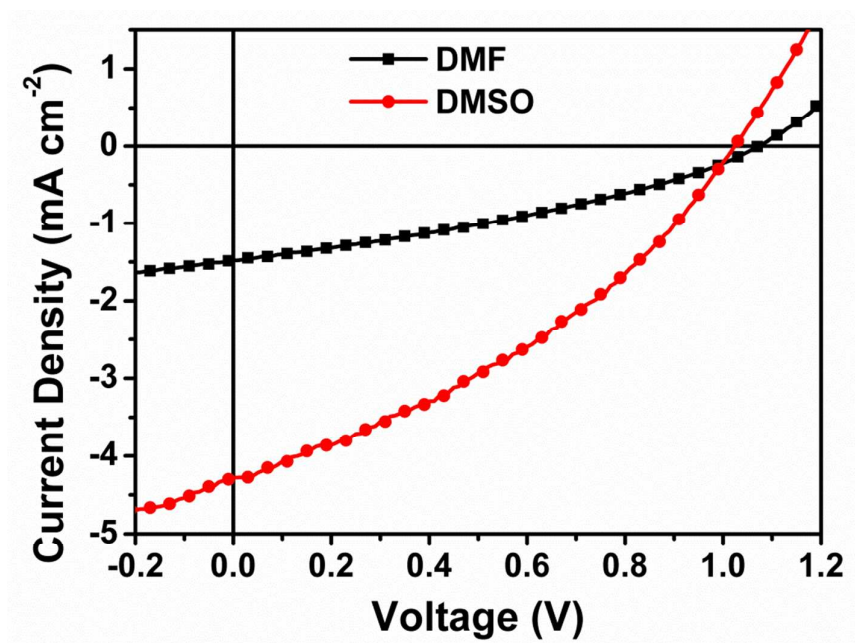

Figure S1  $J$ - $V$  characteristics of  $\text{PbI}_2/\text{N2200}$  hybrid solar cells featuring an opaque electrode (Ca/Al), with the  $\text{PbI}_2$  films prepared using different solvents.

Table S1 Photovoltaic performance parameters of  $\text{PbI}_2/\text{N2200}$  hybrid solar cells featuring an opaque electrode (Ca/Al), with the  $\text{PbI}_2$  films prepared using different solvents.

| $\text{PbI}_2$ Solvent | $V_{\text{oc}}$ (V) | $J_{\text{sc}}$ ( $\text{mA cm}^{-2}$ ) | FF (%) | PCE (%) |
|------------------------|---------------------|-----------------------------------------|--------|---------|
| DMF                    | 1.07                | 1.48                                    | 34.2   | 0.54    |
| DMSO                   | 1.02                | 4.28                                    | 35.7   | 1.56    |

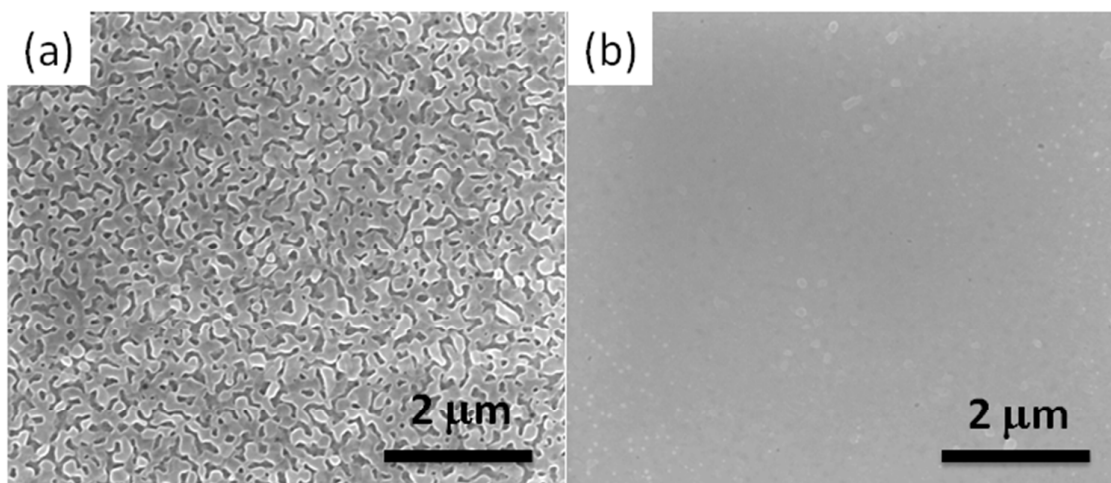

Figure S2 Top-view SEM images of annealed  $\text{PbI}_2$  film prepared on ITO/PEDOT:PSS using (a) DMF and (b) DMSO as solvents.

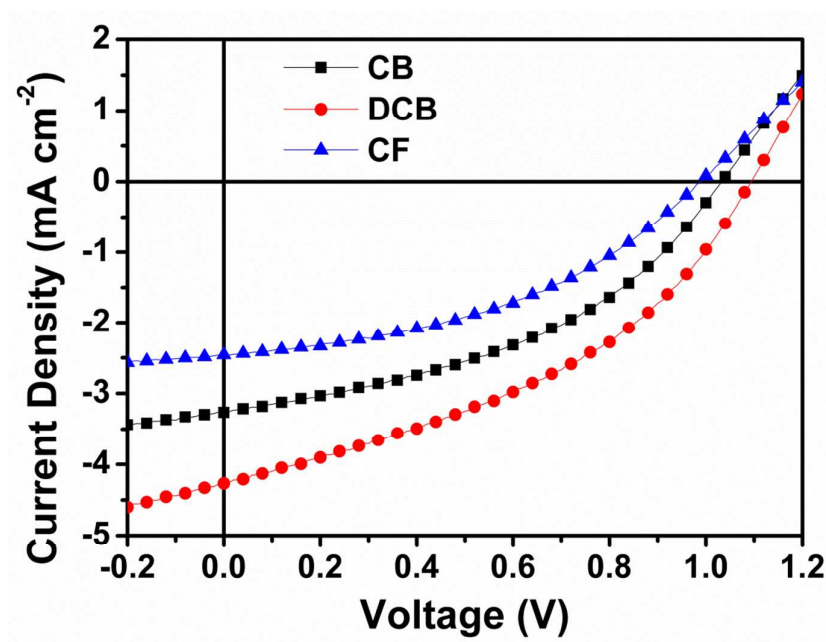

Figure S3  $J$ - $V$  characteristics of  $\text{PbI}_2$ /N2200 hybrid solar cells featuring an opaque electrode (Ca/Al), with the N2200 films prepared using different solvents.

Table S2 Photovoltaic performance parameters of  $\text{PbI}_2/\text{N2200}$  hybrid solar cells featuring an opaque electrode (Ca/Al), with the N2200 film prepared using different solvents.

| N2200 Solvent | $V_{oc}$ (V) | $J_{sc}$ ( $\text{mA cm}^{-2}$ ) | FF (%) | PCE (%) |
|---------------|--------------|----------------------------------|--------|---------|
| CB            | 1.03         | 3.27                             | 42.5   | 1.43    |
| DCB           | 1.09         | 4.27                             | 39.8   | 1.85    |
| CF            | 0.99         | 2.46                             | 42.3   | 1.03    |

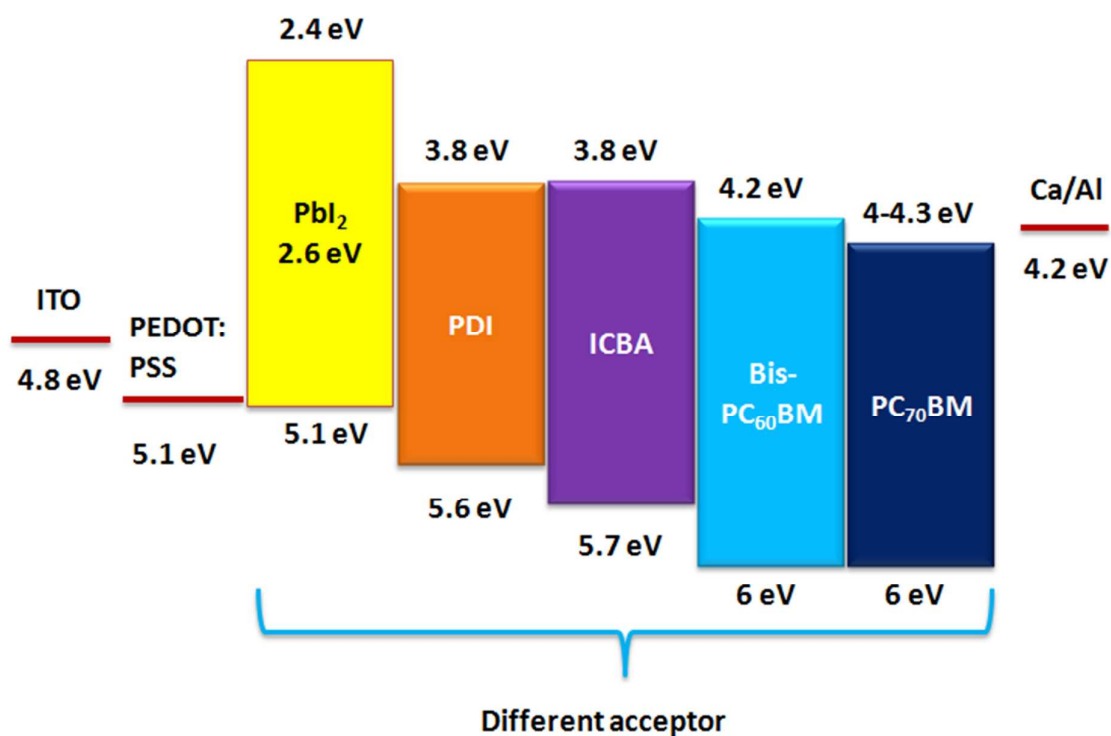

Figure S4 Energy band diagram of  $\text{PbI}_2$ -based solar cells featuring an opaque electrode (Ca/Al) and various acceptor materials.

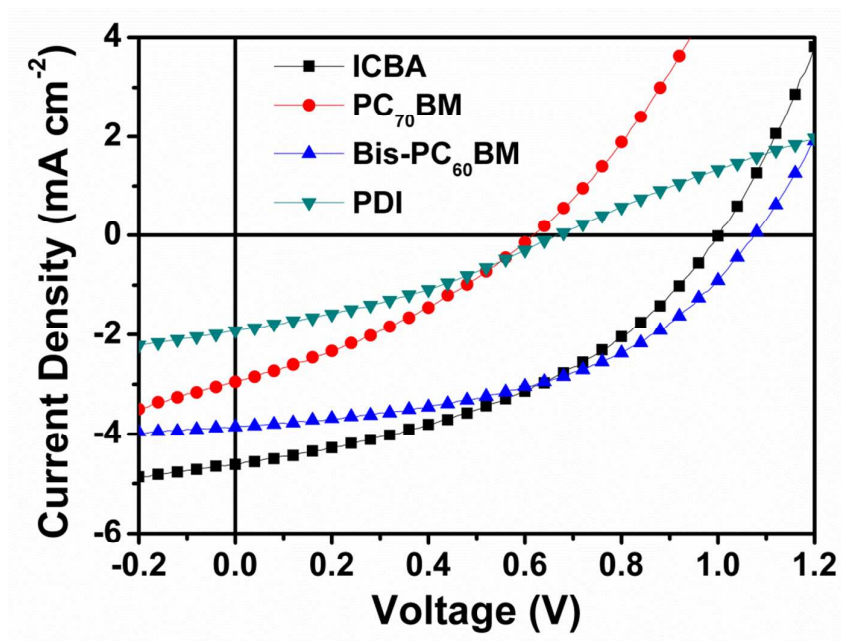

Figure S5  $J$ - $V$  characteristics of  $\text{PbI}_2$ -based hybrid solar cells featuring an opaque electrode (Ca/Al) and various acceptor materials.

Table S3 Photovoltaic performance parameters of  $\text{PbI}_2$ -based hybrid solar cells featuring an opaque electrode (Ca/Al) and various acceptor materials.

| Acceptor material       | $V_{oc}$ (V) | $J_{sc}$ ( $\text{mA cm}^{-2}$ ) | FF (%) | PCE (%) |
|-------------------------|--------------|----------------------------------|--------|---------|
| ICBA                    | 1.00         | 4.62                             | 41.1   | 1.90    |
| PC <sub>70</sub> BM     | 0.62         | 2.95                             | 32.8   | 0.60    |
| Bis-PC <sub>60</sub> BM | 1.02         | 4.86                             | 38.5   | 1.91    |
| PDI                     | 0.67         | 1.92                             | 33.4   | 0.43    |

Table S4 Photovoltaic performance parameters of  $\text{PbI}_2/\text{N2200}$  solar cells featuring an opaque electrode, measured under light intensities ranging from 100 to 10  $\text{mW cm}^{-2}$ .

| Light intensity ( $\text{mW cm}^{-2}$ ) | $V_{\text{oc}}$ (V) | $J_{\text{sc}}$ ( $\text{mA cm}^{-2}$ ) | FF (%) | PCE (%) |
|-----------------------------------------|---------------------|-----------------------------------------|--------|---------|
| 100                                     | 1.02                | 4.28                                    | 35.7   | 1.56    |
| 80                                      | 1.01                | 3.48                                    | 36.4   | 1.60    |
| 60                                      | 1.00                | 2.64                                    | 36.0   | 1.58    |
| 40                                      | 0.98                | 1.78                                    | 36.7   | 1.60    |
| 20                                      | 0.94                | 0.93                                    | 35.1   | 1.55    |
| 10                                      | 0.91                | 0.61                                    | 34.3   | 1.90    |

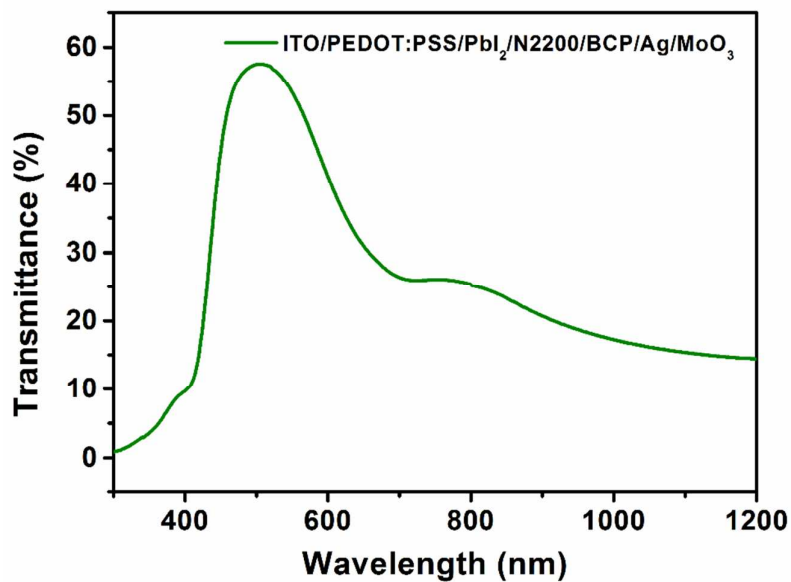

Figure S6 Transmittance of whole device featuring with transparent electrode ( $\text{BCP/Ag/MoO}_3$ ) which clearly showed the Near-IR (NIR) light is absorbed effectively by  $\text{BCP/Ag/MoO}_3$  electrodes.

Table S5 Photovoltaic performance of  $\text{PbI}_2$  solar cell illuminated with light on two sides: front-side illumination intensity was set at 1 sun, while variable light intensity was applied for rear-side illumination.

| Light intensity (sun) | $V_{oc}$ (V) | $J_{sc}$ ( $\text{mA cm}^{-2}$ ) | FF (%) | PCE (%) |
|-----------------------|--------------|----------------------------------|--------|---------|
| 1                     | 0.62         | 2.97                             | 35.8   | 0.66    |
| 1+0.1                 | 0.66         | 3.45                             | 36.5   | 0.75    |
| 1+0.2                 | 0.67         | 3.63                             | 37.0   | 0.76    |
| 1+0.4                 | 0.69         | 4.20                             | 37.6   | 0.78    |
| 1+0.6                 | 0.71         | 4.65                             | 38.2   | 0.79    |
| 1+0.8                 | 0.72         | 5.17                             | 39.0   | 0.81    |
| 1+1                   | 0.74         | 5.60                             | 39.1   | 0.81    |

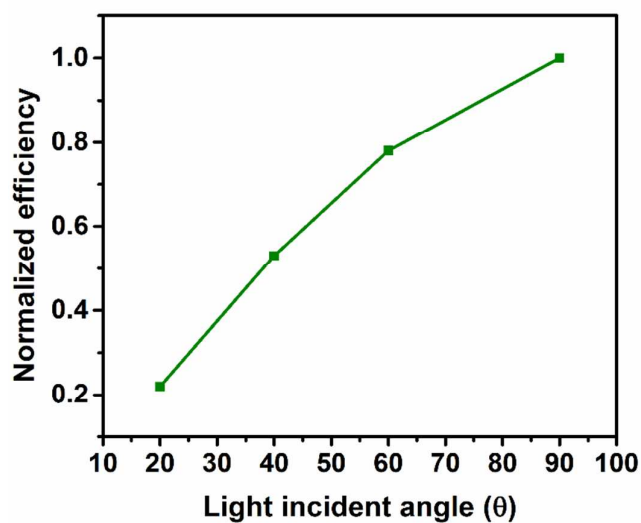

Figure S7 Normalized device performance of  $\text{PbI}_2$ -based hybrid solar cells featuring a transparent electrode at different light incident angle from 20 to 90°.

We studied the influence of the incident angle of light on the device performance because of the alteration of the incident angle of sunlight during a day. Figure S7 showed that normalized efficiency of  $\text{PbI}_2$  based hybrid solar cell with respect to incident angle. We achieved the maximum performance when device is normal ( $90^\circ$ ) to the incident light angle. The device performance was reduced while changing the angle.

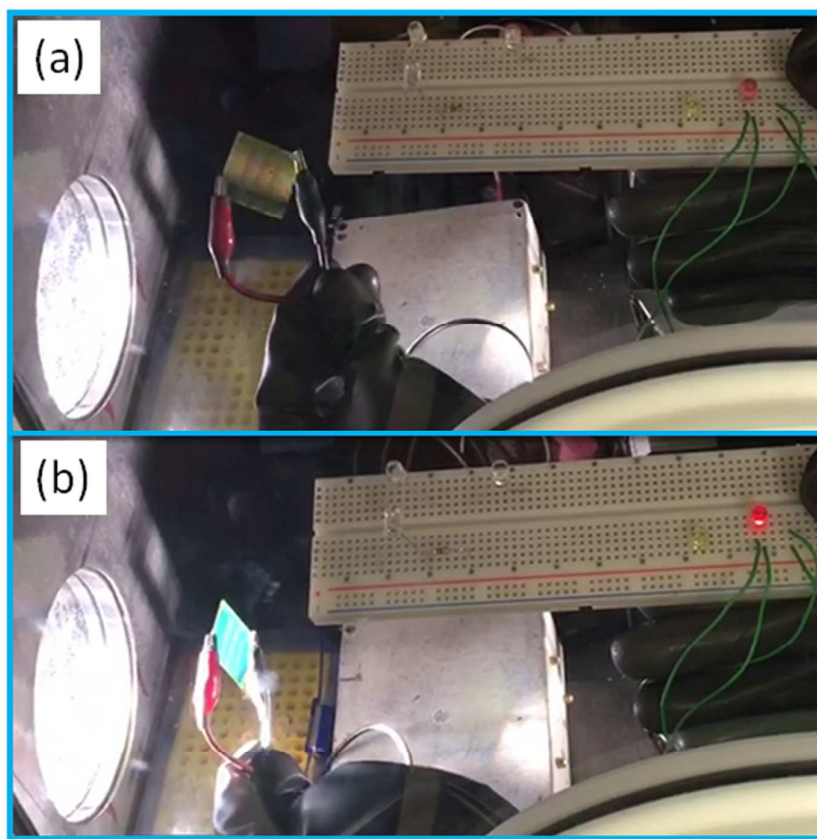

Figure S8 LED lit up by a large-area semitransparent  $\text{PbI}_2$  solar cell fabricated with a transparent top electrode ( $\text{BCP}/\text{Ag}/\text{MoO}_3$ ); (a) without and (b) with sun illumination.
